# Supplementary material for: Developing and evaluating health education learning package (HELP) to control soil-transmitted helminth infections among Orang Asli children in Malaysia
Source: PubMed Central journal article supplement (PMC4261692; doi:10.1186/1756-3305-7-416), 2014-09-02

# Basuhlah tangan

- sebelum makan.
- selepas bermain di tanah.
- selepas ke tandas.

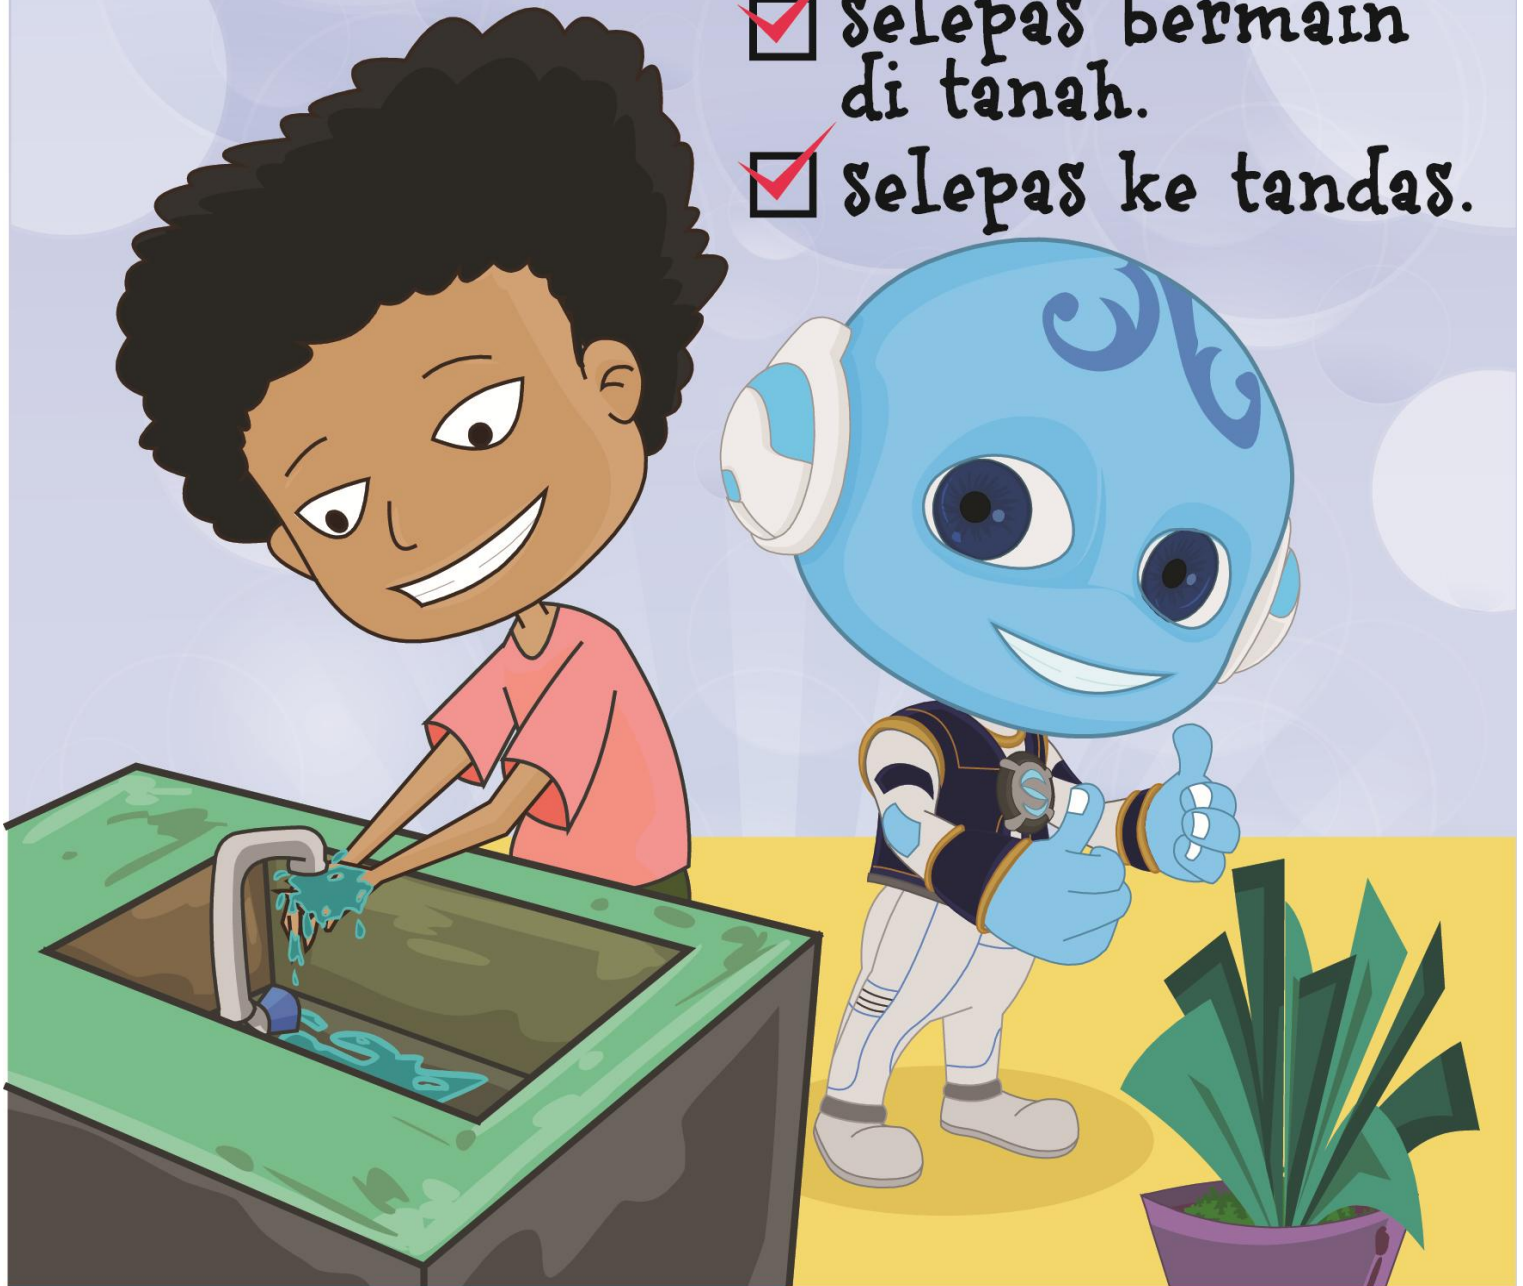

## Health Education Learning Package to control Soil-Transmitted Helminthiasis among Orang Asli Schoolchildren

Project team: Assoc. Prof. Dr. Hesham M. Al-Mekhlafi  
Professor Dr. Rohela Mahmud  
Assoc. Prof. Dr. Yvonne Al Lim  
Dr. Ahmed K. Al-Delaimy

Department of Parasitology, Faculty of Medicine, University of Malaya

Contact: halmekhlafi@yahoo.com, halmekhlafi@um.edu.my

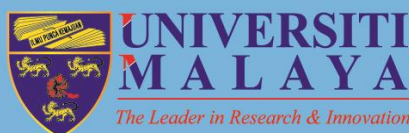

In collaboration with:

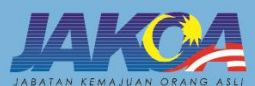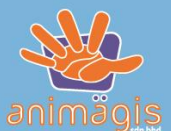

Pakailah

**KASUT**

bila bermain  
di luar

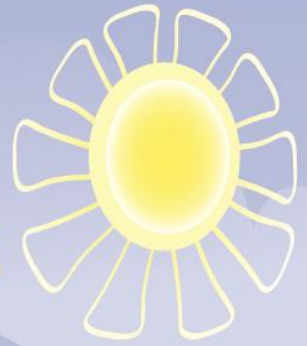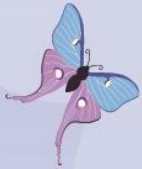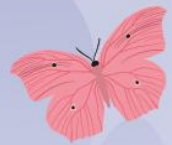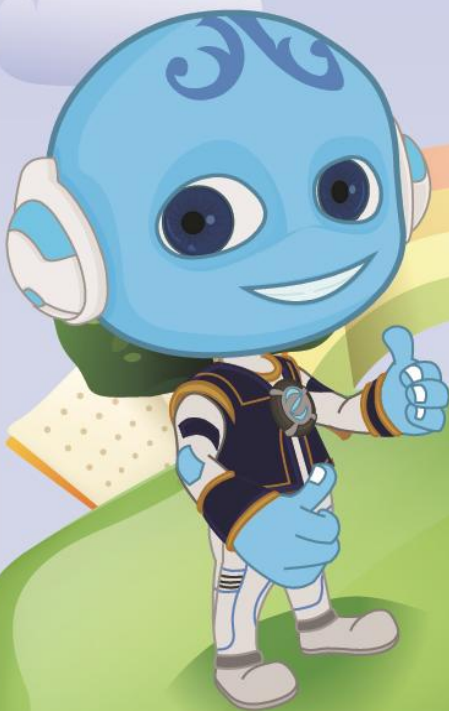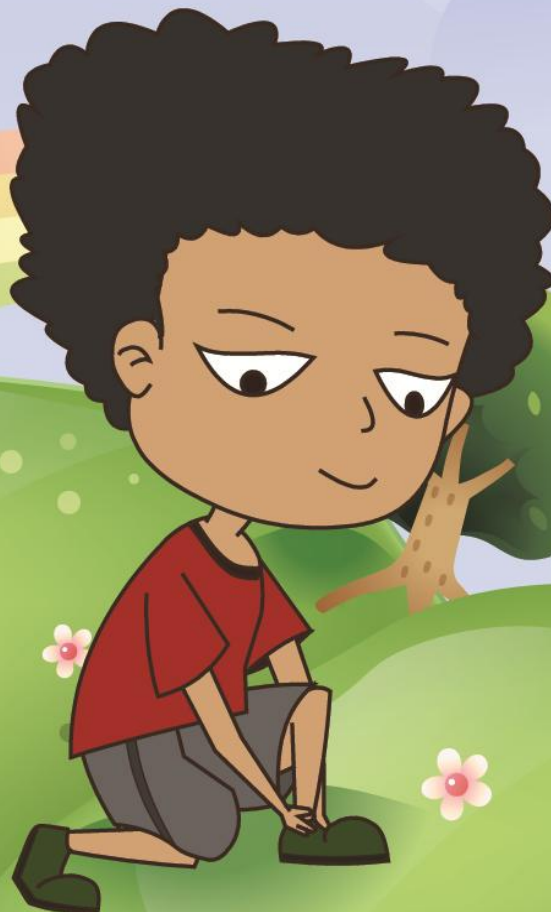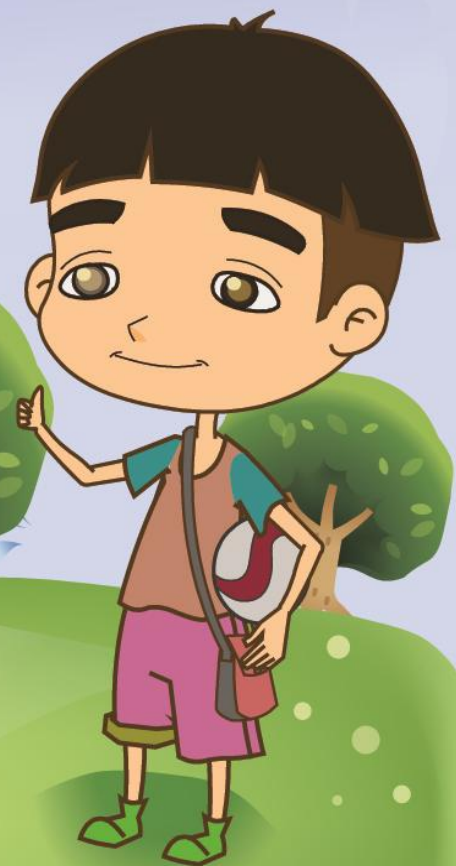

**Health Education Learning Package**

**to control Soil-Transmitted Helminthiasis among Orang Asli Schoolchildren**

Project team: Assoc. Prof. Dr. Hesham M. Al-Mekhlafi  
Professor Dr. Rohela Mahmud  
Assoc. Prof. Dr. Yvonne Al Lim  
Dr. Ahmed K. Al-Delaimy

Department of Parasitology, Faculty of Medicine, University of Malaya

Contact: halmekhlafi@yahoo.com, halmekhlafi@um.edu.my

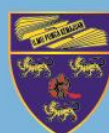

**UNIVERSITI  
MALAYA**

*The Leader in Research & Innovation*

In collaboration with:

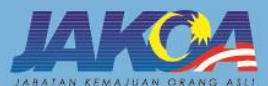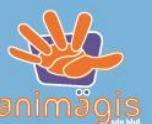



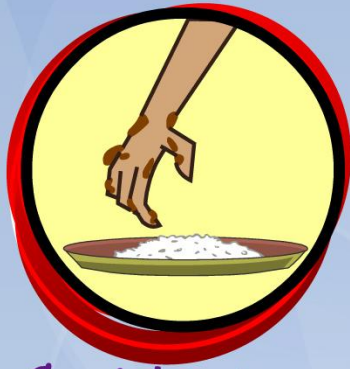

Cuci tangan sebelum makan

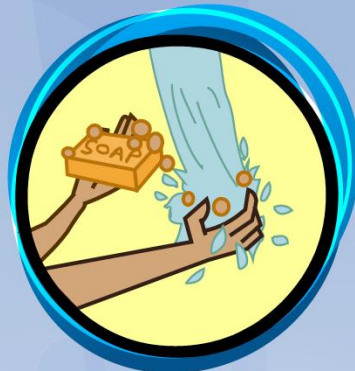

Cuci tangan selepas bermain tanah

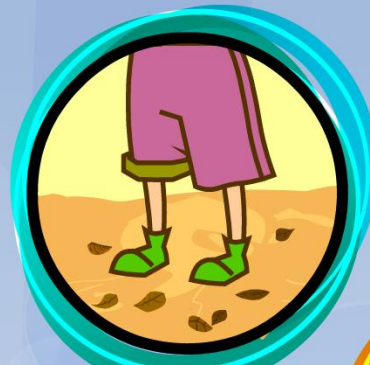

Pakai kasut bila bermain di tanah

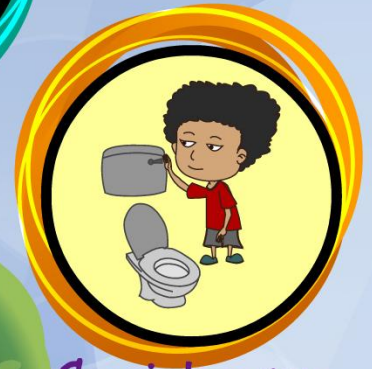

Cuci tangan selepas ke tandas.

Potong kuku

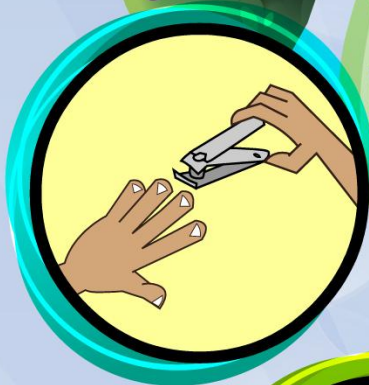

Minum air yang dimasak

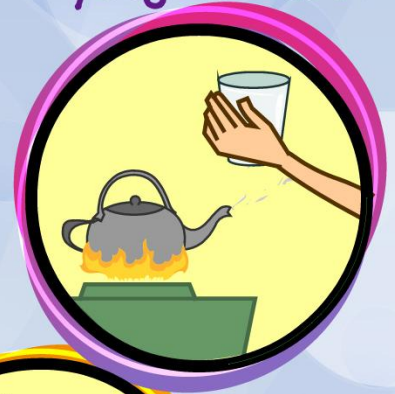

# Untuk hidup sihat tanpa Jangkitan Cacing Tularan Tanah

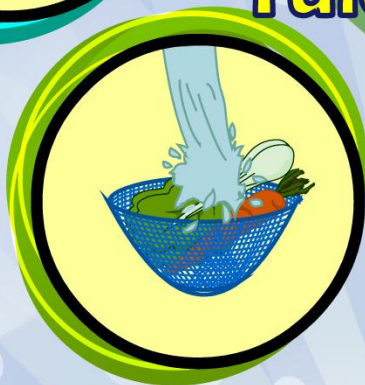

Basuh sayuran dan buah-buahan dengan air bersih

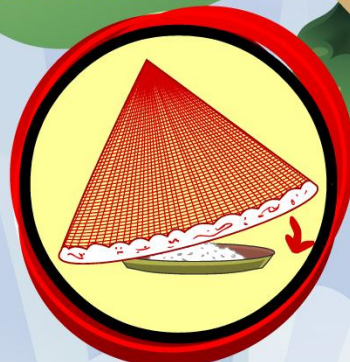

Lindungi makanan daripada lalat

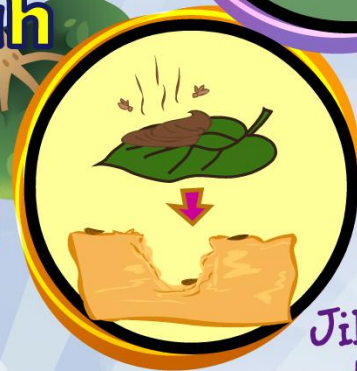

Jika tiada tandas, buang air jauh dari kawasan bermain

**Health Education Learning Package  
to control Soil-Transmitted Helminthiasis among Orang Asli Schoolchildren**

Project team: Assoc. Prof. Dr. Hesham M. Al-Mekhlafi  
Professor Dr. Rohela Mahmud  
Assoc. Prof. Dr. Yvonne Al Lim  
Dr. Ahmed K. Al-Delaimy

Department of Parasitology, Faculty of Medicine, University of Malaya

Contact: halmekhlafi@yahoo.com, halmekhlafi@um.edu.my

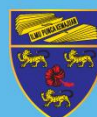

**UNIVERSITI  
MALAYA**  
*The Leader in Research & Innovation*

In collaboration with:

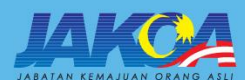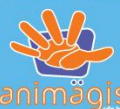

Supplement: 13071_2014_1598_MOESM1_ESM.pdf [file 13071_2014_1598_MOESM1_ESM.pdf]
