# Supplementary material for: Developing and evaluating health education learning package (HELP) to control soil-transmitted helminth infections among Orang Asli children in Malaysia
Source: PubMed Central journal article supplement (PMC4261692; doi:10.1186/1756-3305-7-416), 2014-09-02

# KOMIK

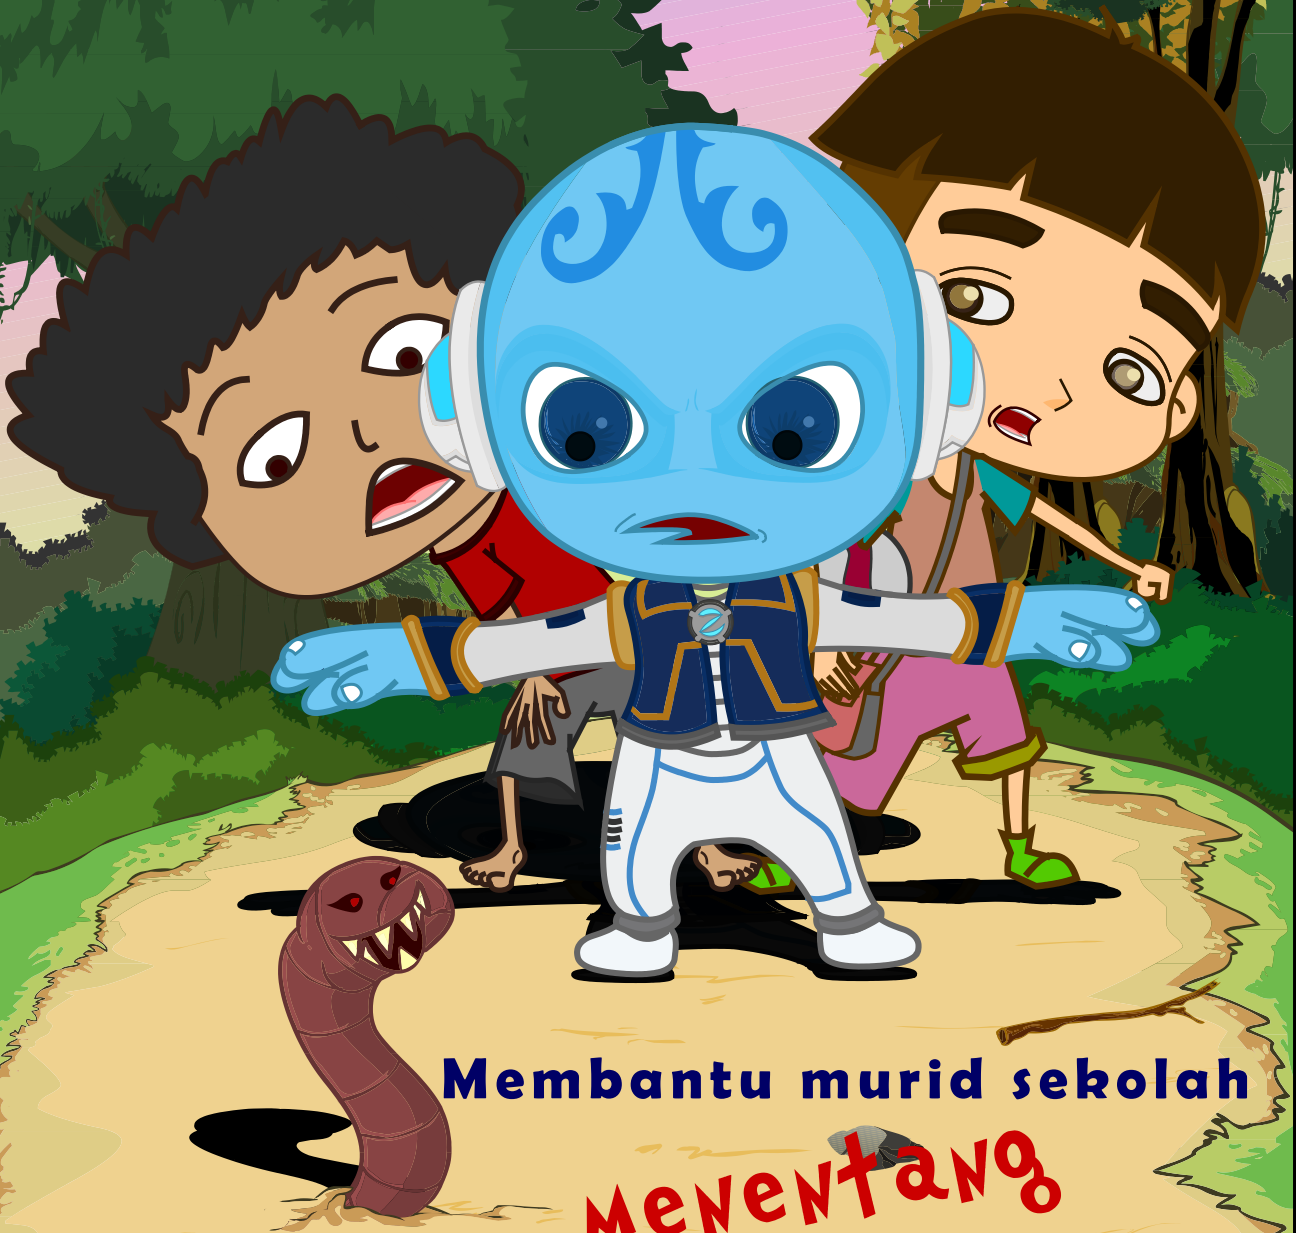

Membantu murid sekolah

**menentang**

**Cacing Tularan Tanah**

# Basuh Tangan Dengan Betul

Mari kawan-kawan kita amalkan.  
Guna cara betul untuk basuh tangan.  
Ada tujuh langkah perlu kita amal.  
Agar jauh dari penyakit dan kuman.

Pertama, guna sabun dengan secukupnya,  
barulah harum wangi tangan kita.

Kedua, gosokkan sabun di tapak tangan,  
biar sabun kena di semua bahagian.

Ketiga, gosok di setiap jari-jari kita,  
jangan lupa di celah kuku-kuku juga.

Keempat, gosok kuku di tapak tangan,  
supaya tanggal semua kotoran.

Kelima, gosok sabun di belakang tangan  
agar tangan bersih keseluruhan

Keenam, basuh dengan air secukupnya  
hindari semua kotoran dan bakteria

Terakhir, keringkan tangan guna kain bersih  
barulah selesai semuanya

Jagalah kebersihan tangan kita,  
sebab tangan guna untuk banyak perkara.  
Guna untuk pegang, untuk angkat,  
untuk makan.

Bila tangan bersih baru orang suka kita.

**Lagu dan Lirik oleh : Abu Zaharen**

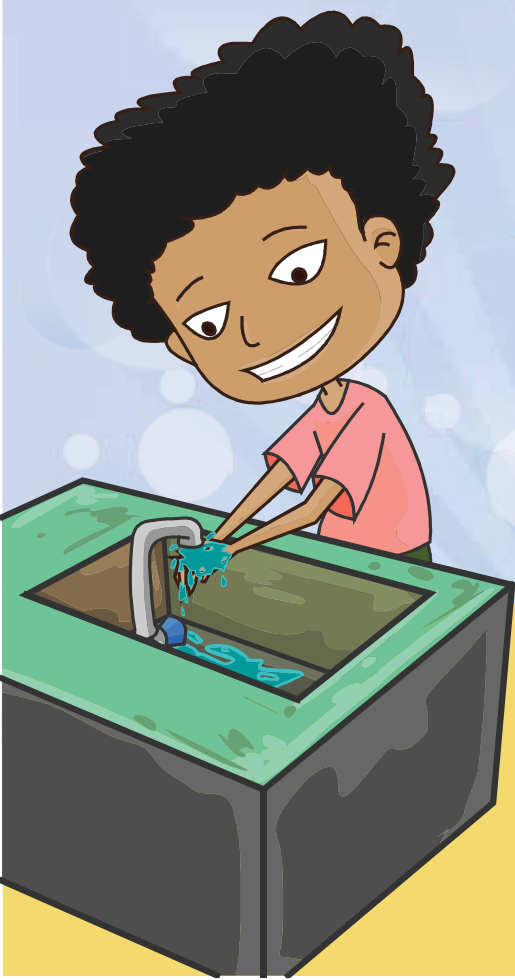

SUATU HARI DI SEKOLAH..

SELAMAT  
PAGI,  
CIKGU!

SELAMAT PAGI. HARI INI CIKGU AKAN  
UMUMKAN KEPUTUSAN PEPERIKSAAN  
YANG LALU.

Friday

KITA AKAN LIHAT SIAPA YANG  
MENDAPAT MARKAH  
TERTINGGI DAN SIAPA  
YANG PALING RENDAH!

PASTINYA SAYA  
YANG MENDAPAT  
MARKAH PALING  
RENDAH

*gigit~gigit~*

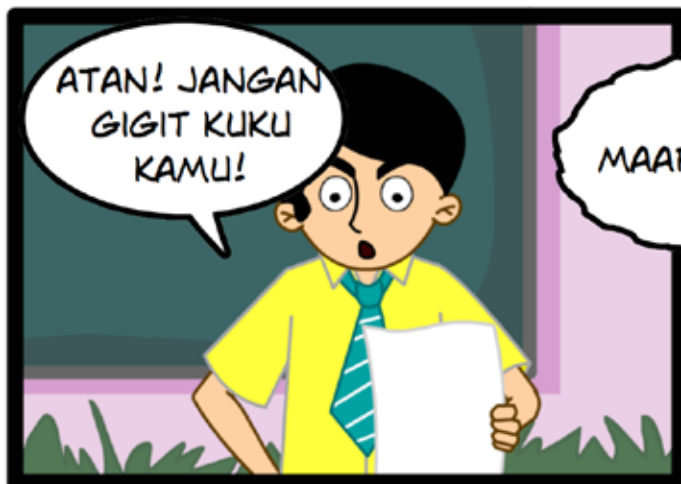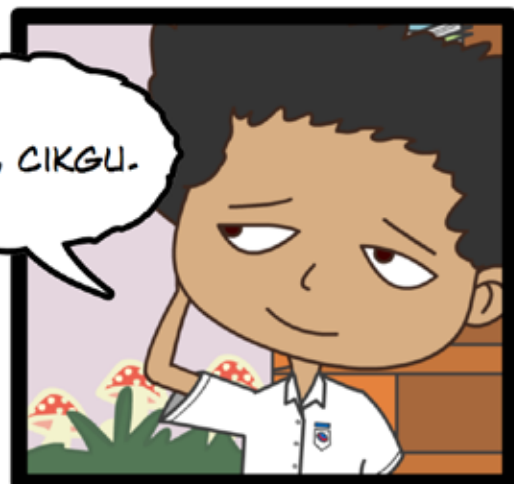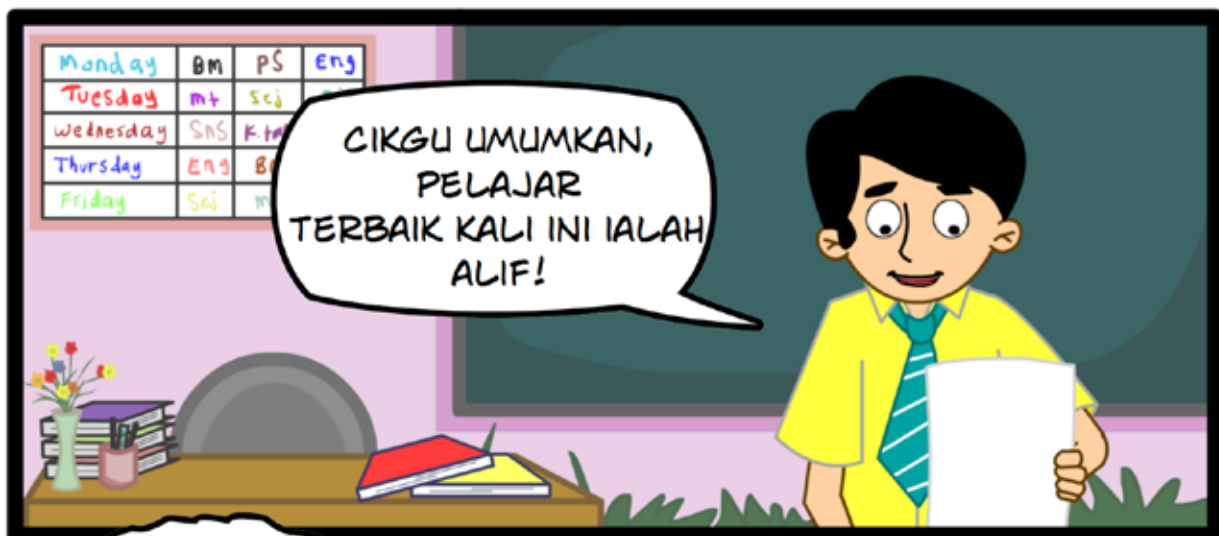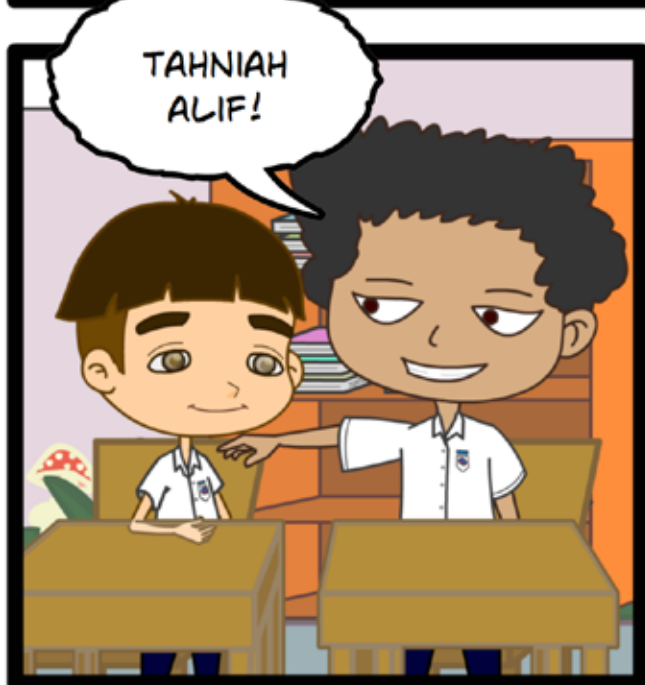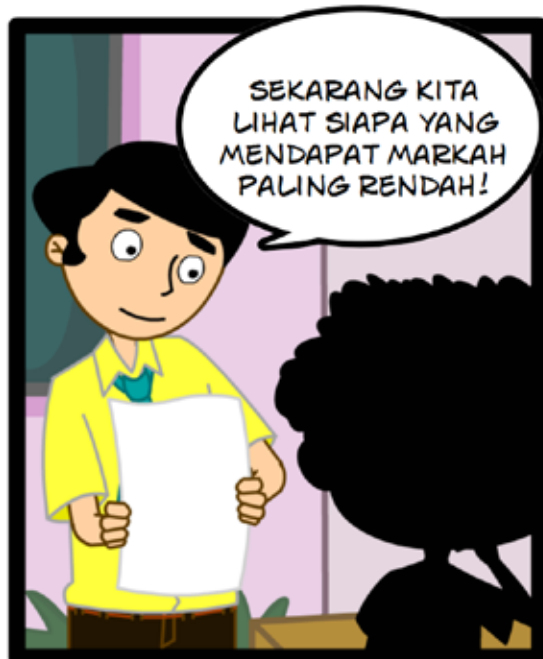

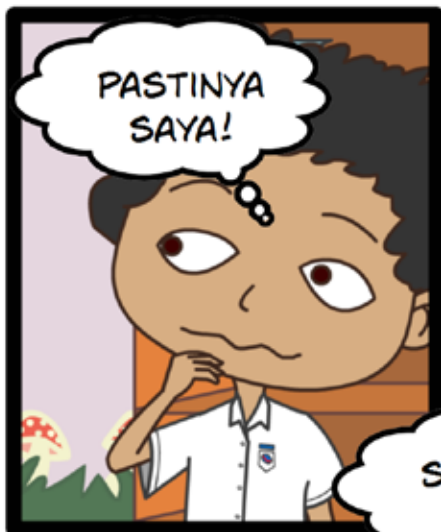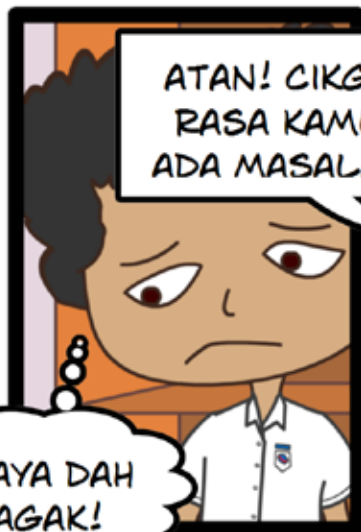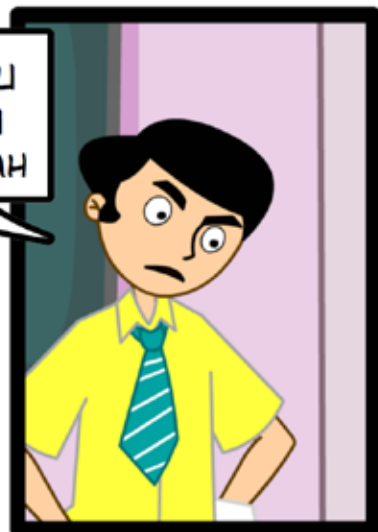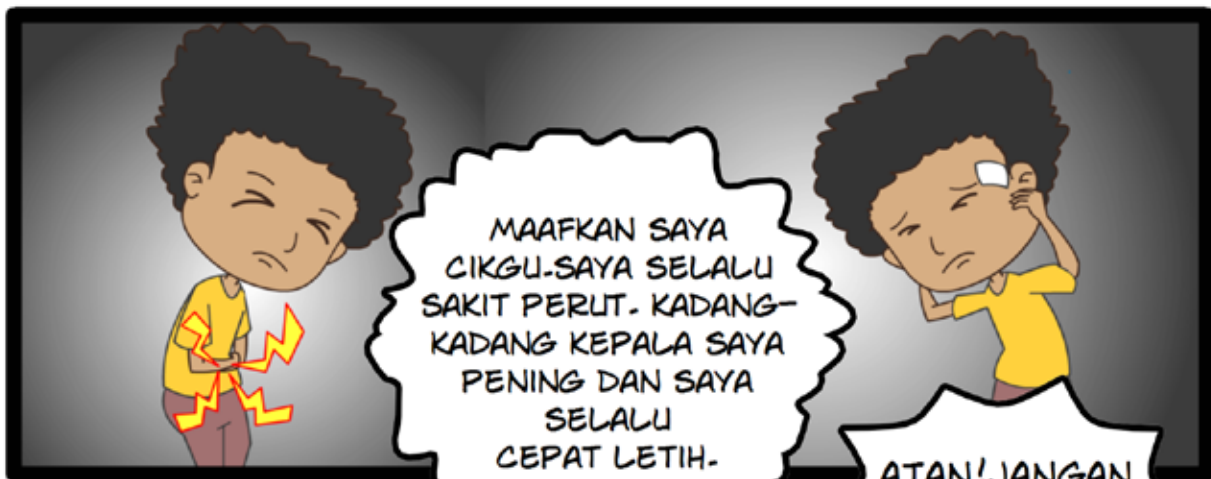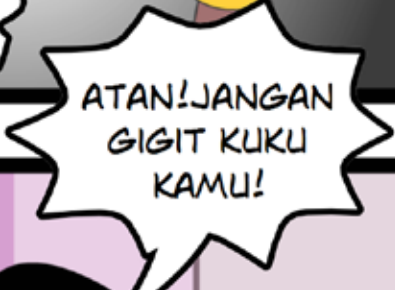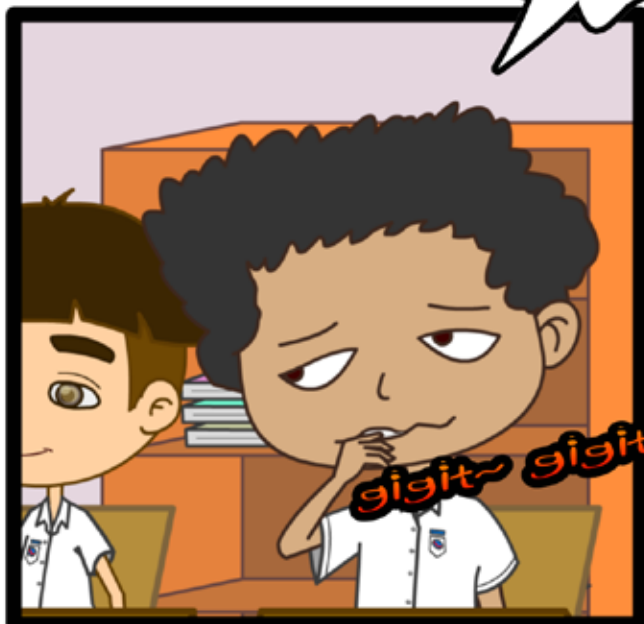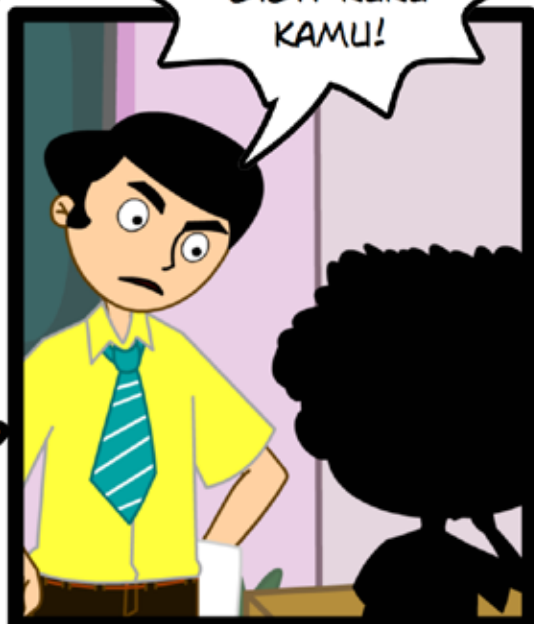

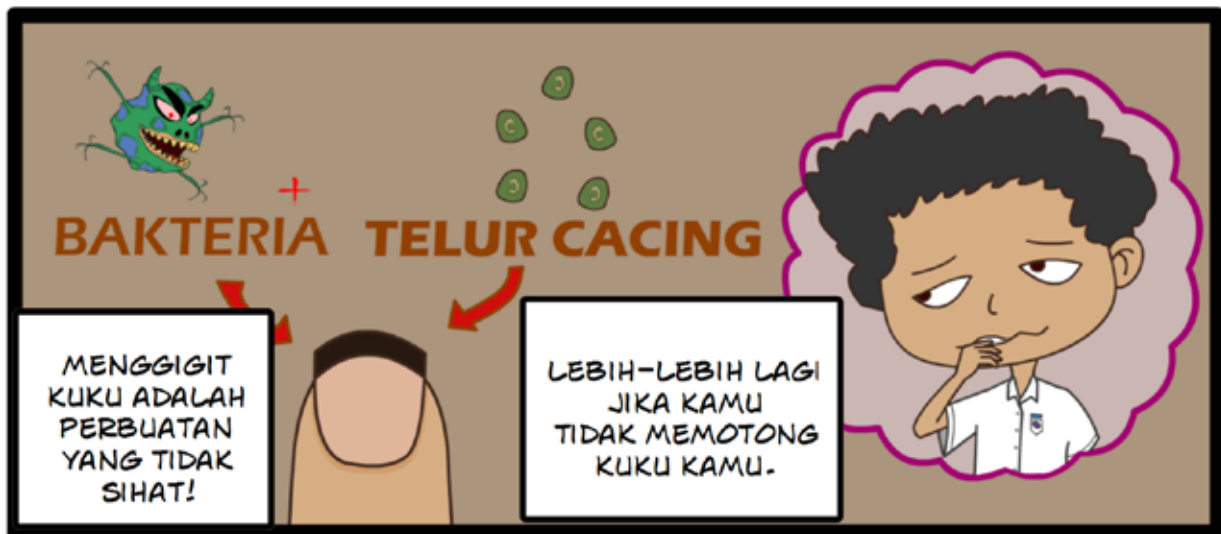

MENGGIGIT KUKU ADALAH PERBUATAN YANG TIDAK SIHAT!

LEBIH-LEBIH LAGI JIKA KAMU TIDAK MEMOTONG KUKU KAMU.

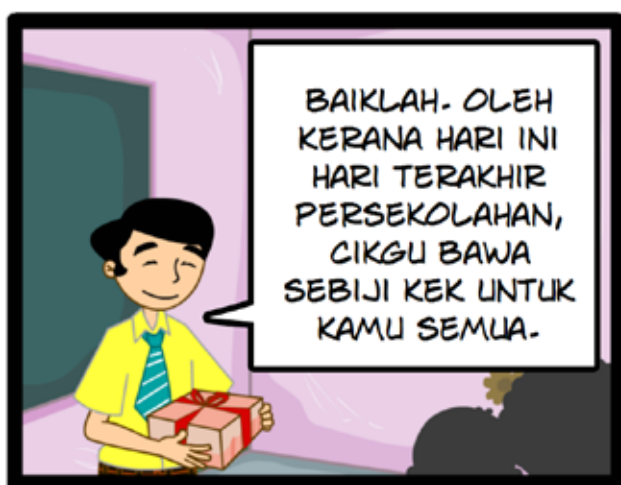

BAIKLAH. OLEH KERANA HARI INI HARI TERAKHIR PERSEKOLAHAN, CIKGU BAWA SEBIJI KEK UNTUK KAMU SEMUA.

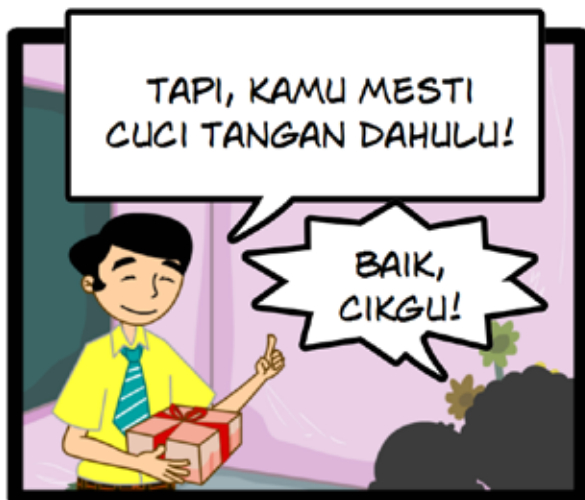

TAPI, KAMU MESTI CUCI TANGAN DAHULU!

BAIK, CIKGU!

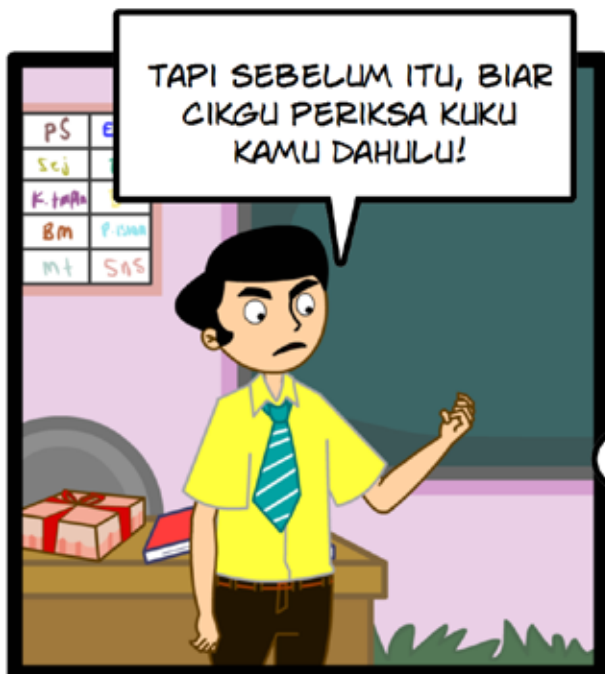

TAPI SEBELUM ITU, BIAR CIKGU PERIKSA KUKU KAMU DAHULU!

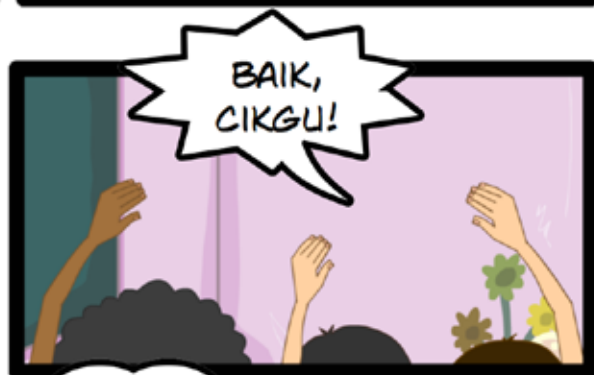

BAIK, CIKGU!

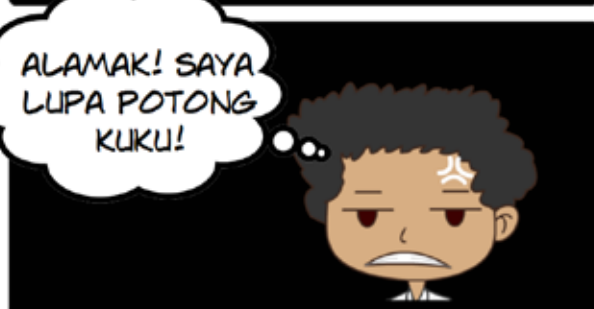

ALAMAK! SAYA LUPA POTONG KUKU!

LEWAT PETANG ITU---

ATAN!  
MARI KITA  
MAIN BOLA!

EH. KENAPA NI?  
AWAK NAMPAK  
PUCAT DAN SEDIH.

SAYA HAIRAN APA YANG TIDAK  
KENA DENGAN DIRI SAYA

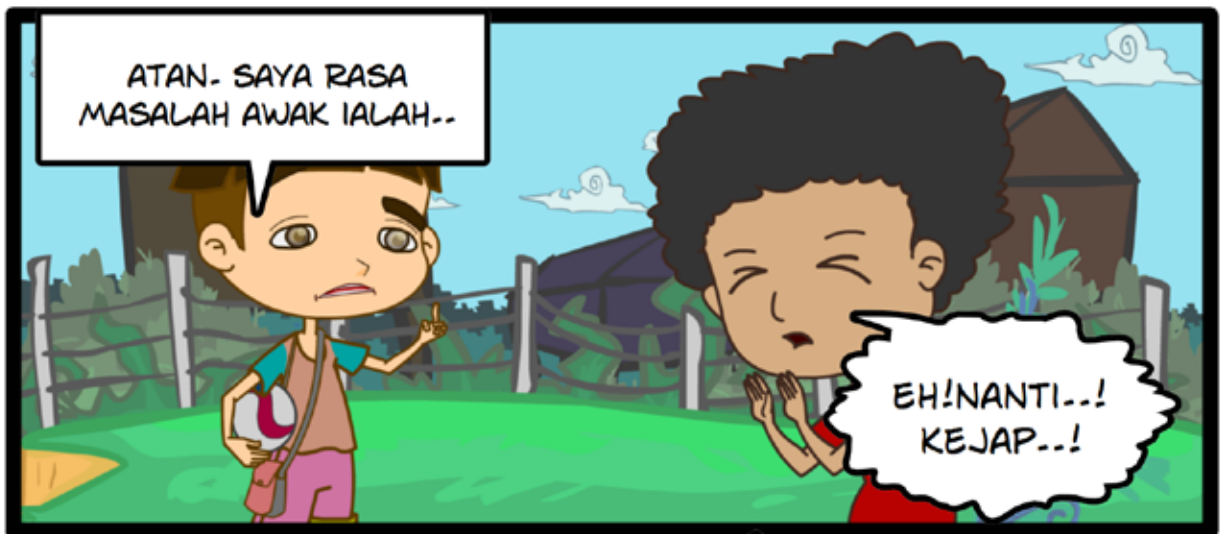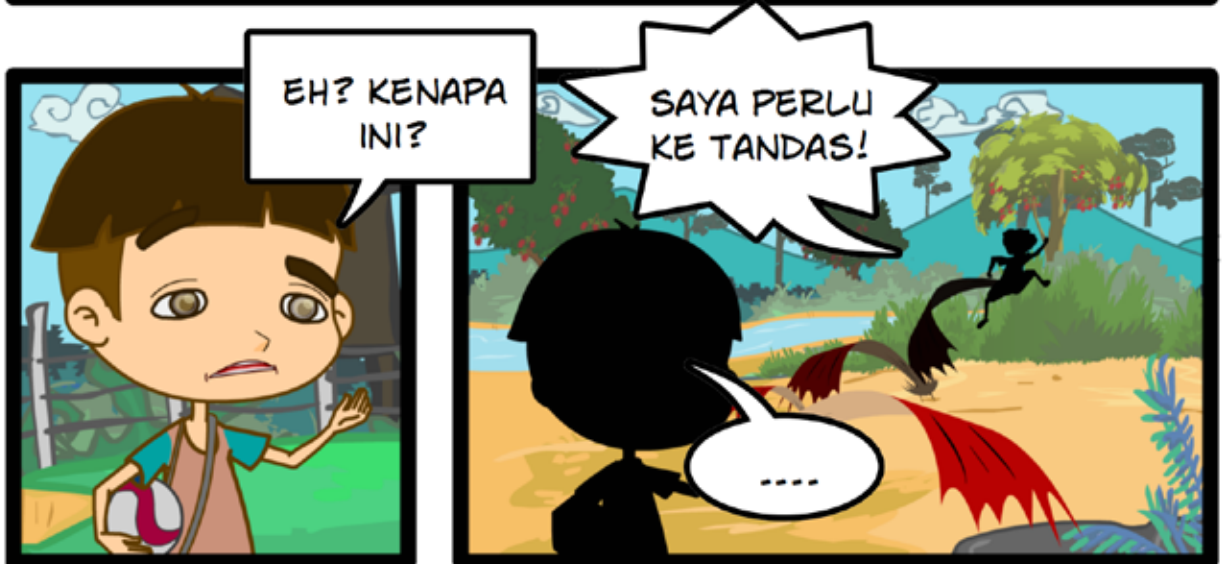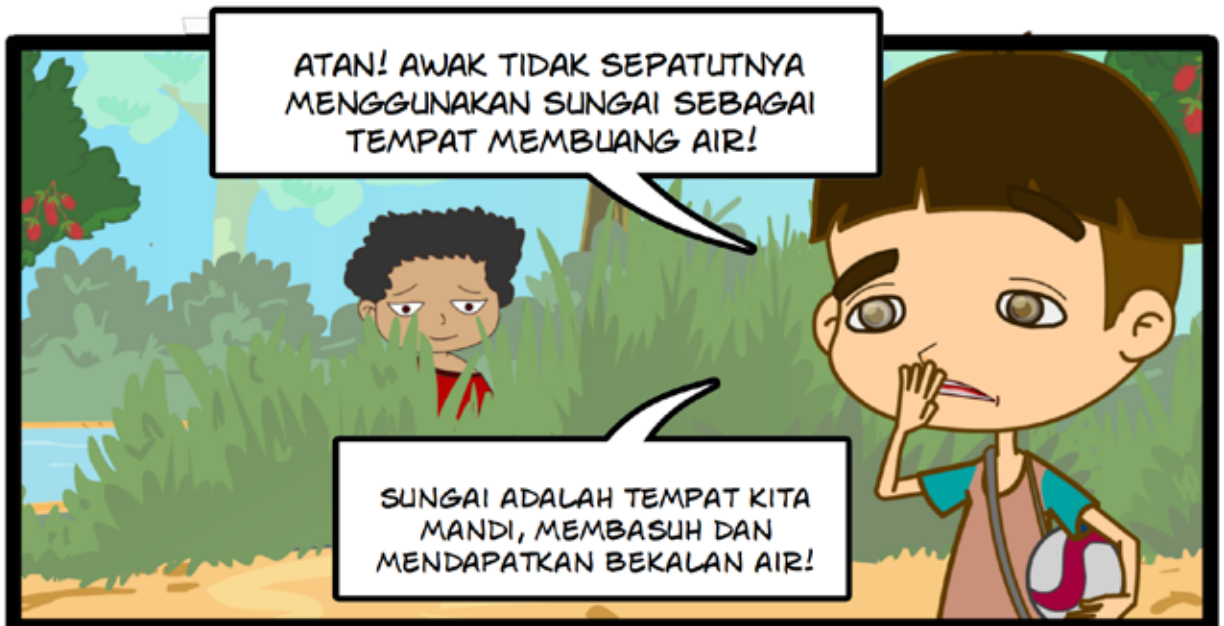



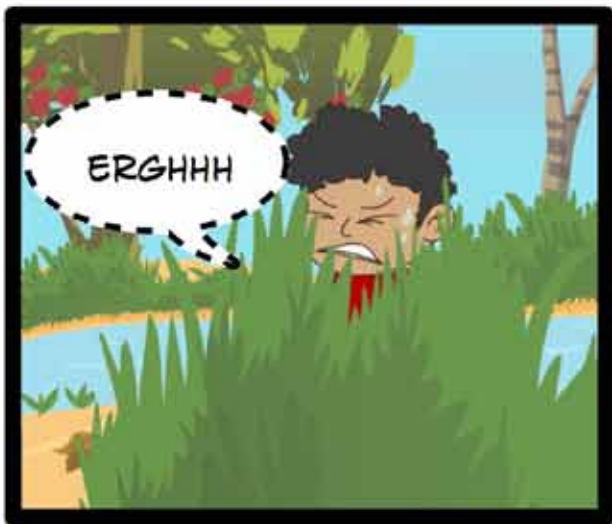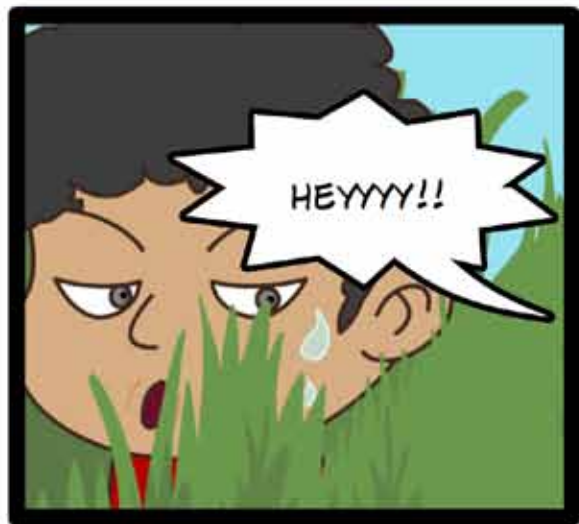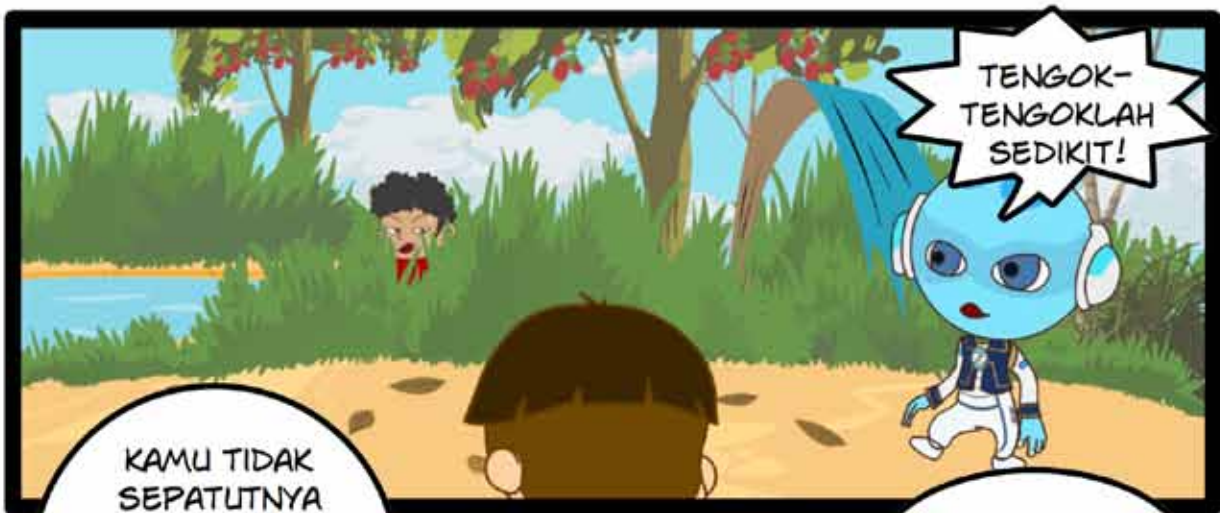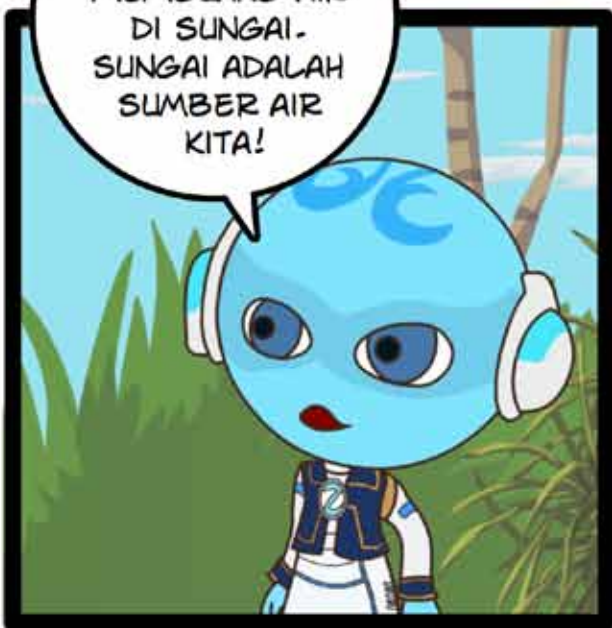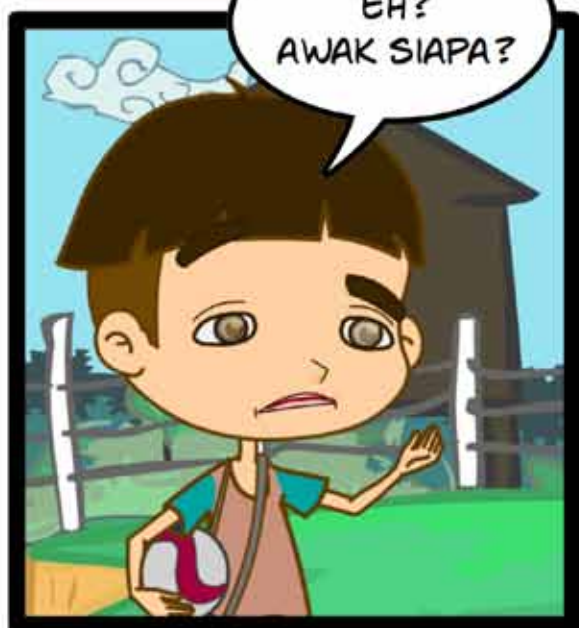



HAI! NAMA SAYA  
ZIBIRU. SAYA DARI  
ANGKASA LEPAS!

KENAPA KAMU  
DI SINI?

SAYA SEDANG  
MENJALANKAN  
KAJIAN TENTANG  
CACING!

ATAN BARU SAHAJA SELESAI  
MEMBUANG AIR APABILA TERLIHAT  
RAMBUTAN DI ATAS TANAH.

AHH--LEGANYA!  
EH?  
RAMBUTAN?

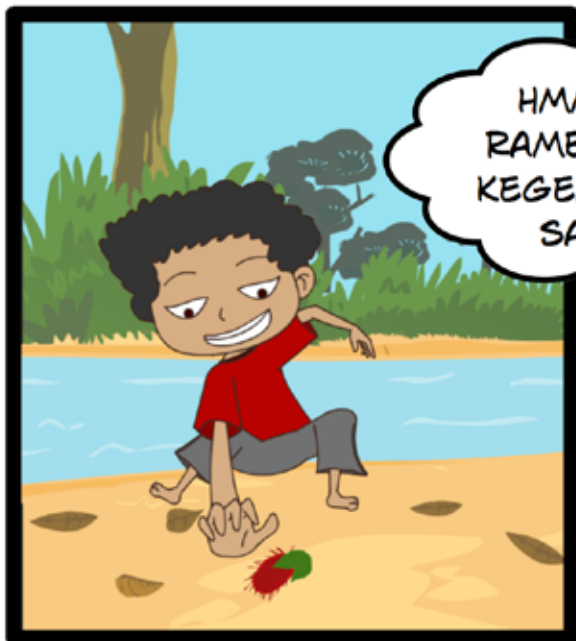

HMMM..  
RAMBUTAN!  
KEGEMARAN  
SAYA!

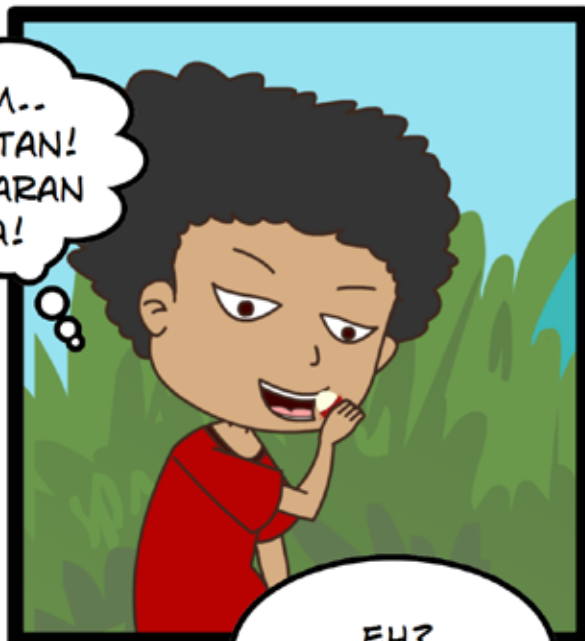

EH?  
KENAPA?

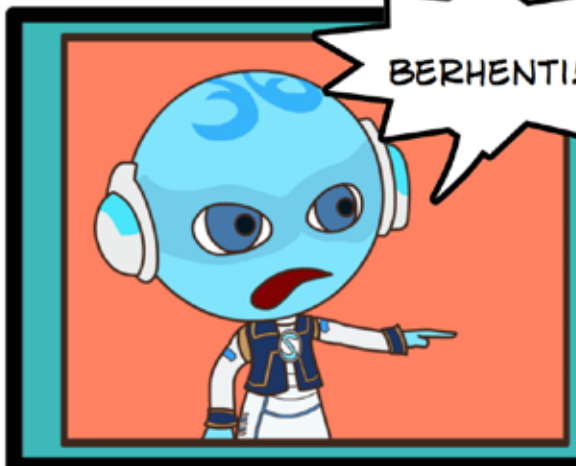

BERHENTI!!

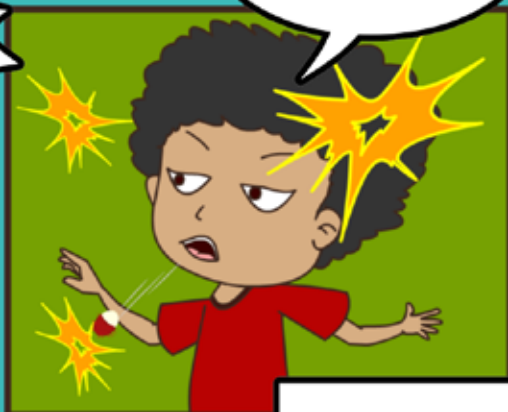

KENAPA  
KAMU  
BERKAKI  
AYAM?

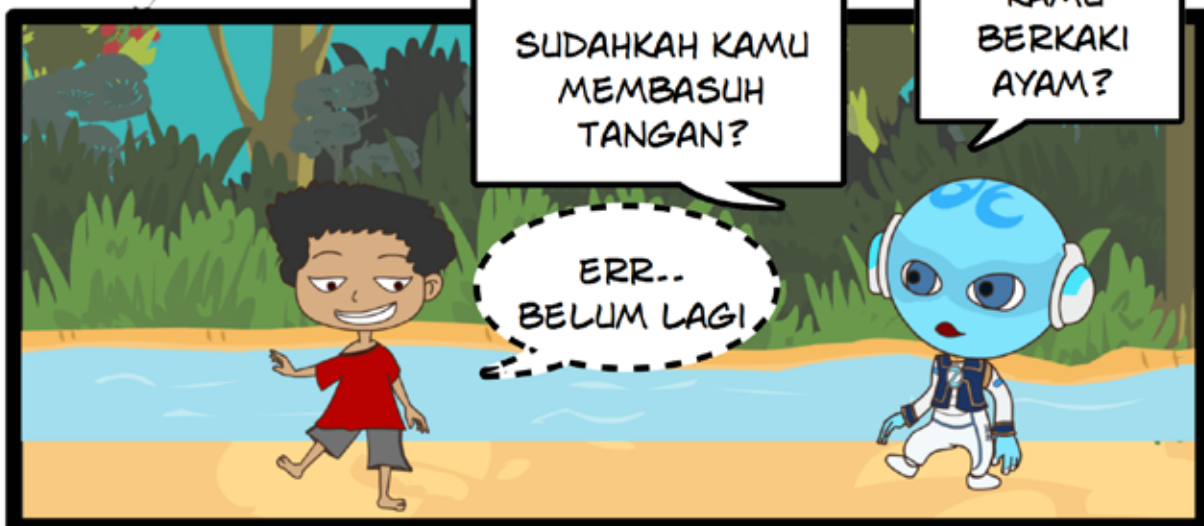

SUDAHKAH KAMU  
MEMBASUH  
TANGAN?

ERR..  
BELUM LAGI

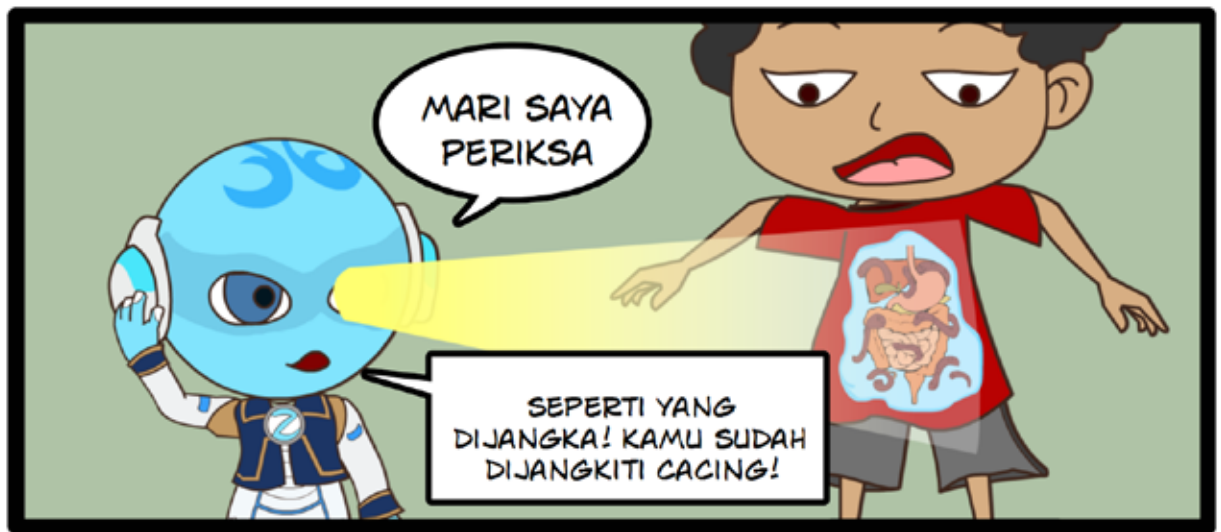

MARI SAYA PERIKSA

SEPERTI YANG DIJANGKA! KAMU SUDAH DIJANGKITI CACING!

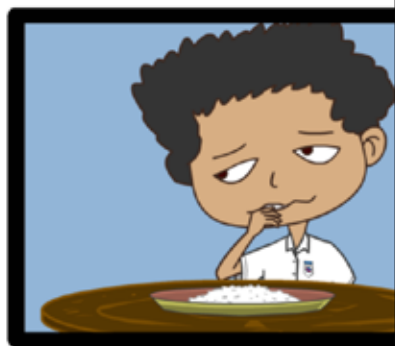

MANUSIA DIJANGKITI CACING USUS SEKIRANYA TERTELAN TELUR CACING MELALUI MAKANAN TERCEMAR ATAU JARI YANG KOTOR. ATAU MELALUI PENETRASI KULIT.

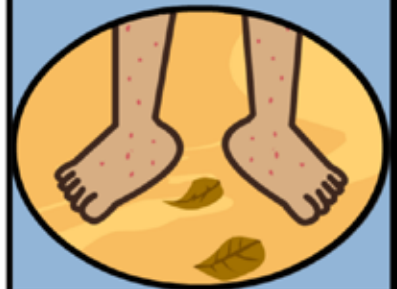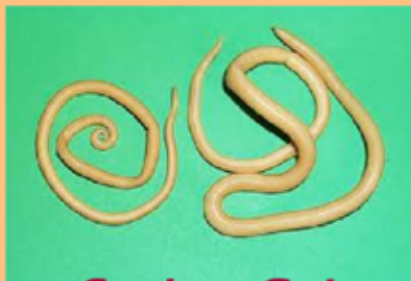

Cacing Gelang

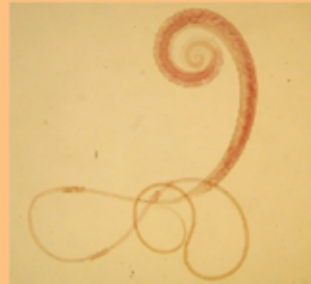

Cacing Cambuk

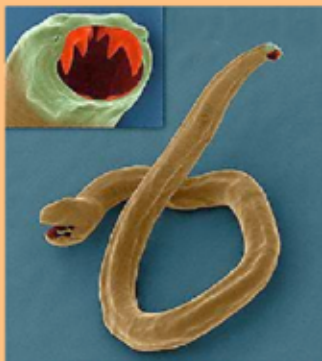

Cacing Kait

CACING DAN TELUR MEREKA ADA DI MANA-MANA. SEBAB ITU KAMU PERLU BERHATI-HATI BILA BERMAIN DENGAN TANAH.

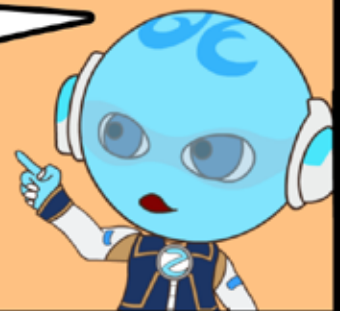

JANGKITAN CACING AKAN  
MENGANGGU TUMPUAN  
KAMU SEMASA BELAJAR!

APA YANG PERLU  
SAYA LAKUKAN?

SAYA AKAN  
BANTU!

KAMU PERLU INGAT...

POTONG  
KUKU!

PAKAI KASUT  
BILA BERMAIN  
DI LUAR.

BASUH TANGAN SEBELUM  
MAKAN. SELEPAS KE  
TANDAS DAN SELEPAS  
BERMAIN TANAH.

JANGAN BUANG AIR DI  
DALAM SUNGAI.  
GUNAKAN TANDAS  
YANG BETUL.

BUANG NAJIS DI DALAM  
LUBANG ATAU DI ATAS  
DAUN, KEMUDIAN TANAM.

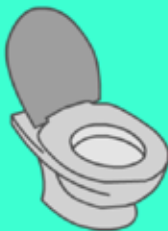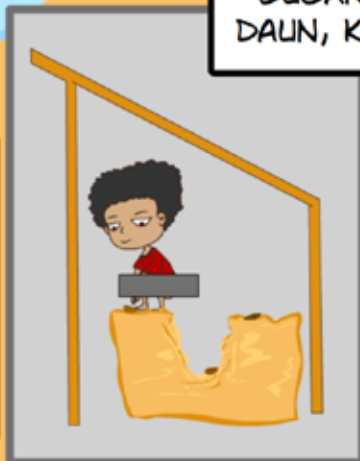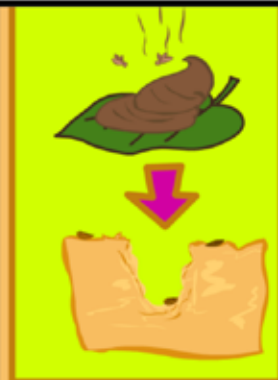

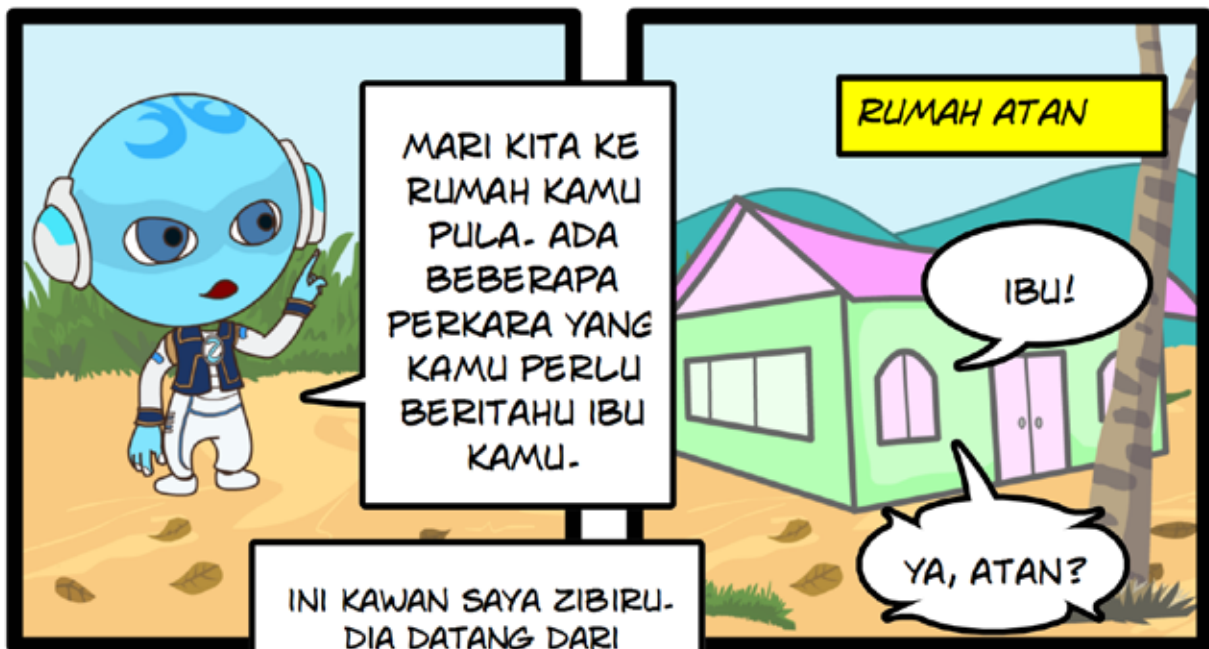

MARI KITA KE RUMAH KAMU PULA. ADA BEBERAPA PERKARA YANG KAMU PERLU BERITAHU IBU KAMU.

RUMAH ATAN

IBU!

YA, ATAN?

INI KAWAN SAYA ZIBIRU. DIA DATANG DARI ANGKASA LEPAS. DIA NAK BANTU SAYA ATASI MASALAH JANGKITAN CACING!

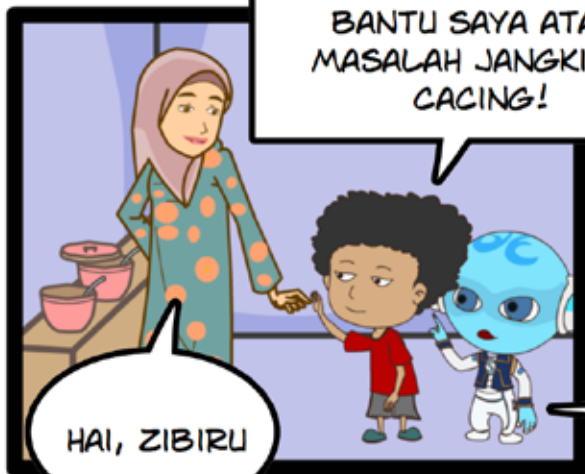

HAI, ZIBIRU

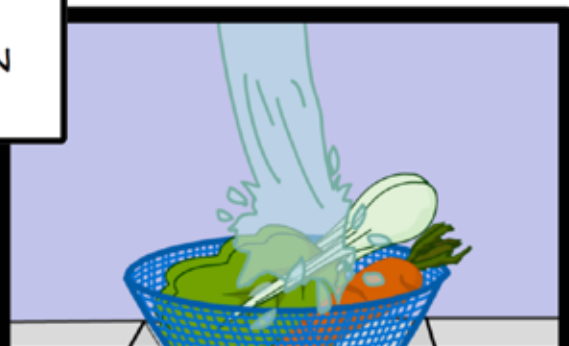

SENTIASA BASUH SAYUR DAN BUAHAN DENGAN AIR BERSIH

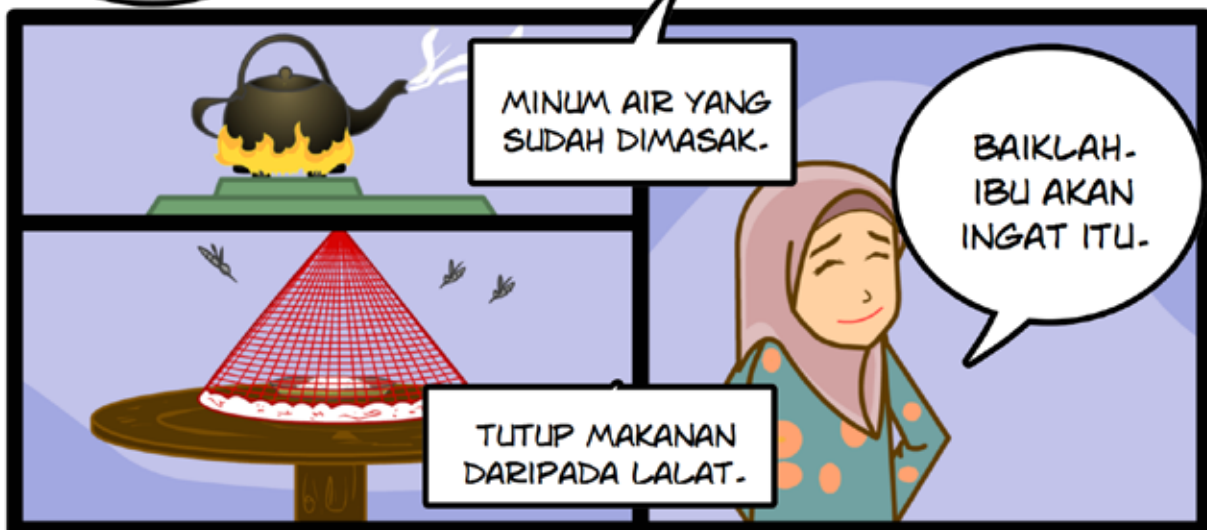

MINUM AIR YANG SUDAH DIMASAK.

BAIKLAH. IBU AKAN INGAT ITU.

TUTUP MAKANAN DARIPADA LALAT.

SEJAK ITU, ATAN MULA BERUBAH

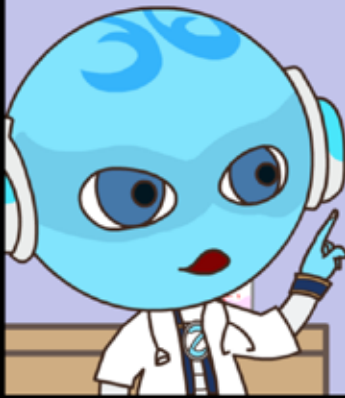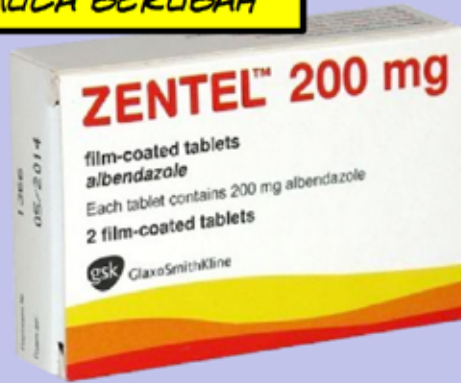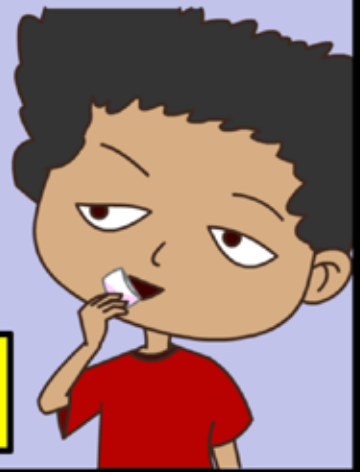

ATAN MENGAMBIL UBAT MERAWAT KECACINGAN.

SENTIASA MEMASTIKAN KUKUNYA PENDEK.

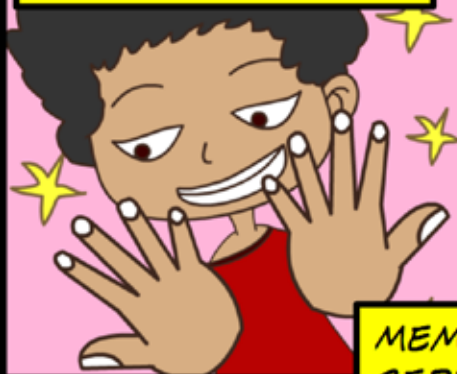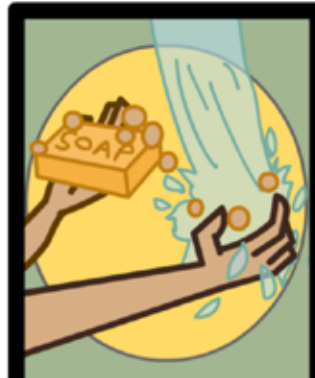

MENGGUNAKAN TANDAS 'FLUSH'

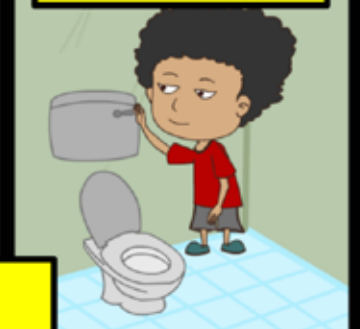

MEMBASUH TANGAN SEBELUM MAKAN DAN SETELAH BERMAIN TANAH.

MEMAKAI KASUT BILA KELUAR.

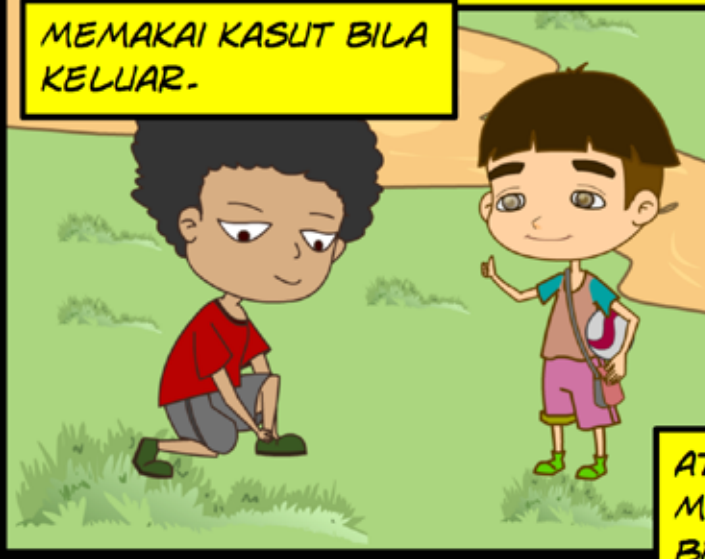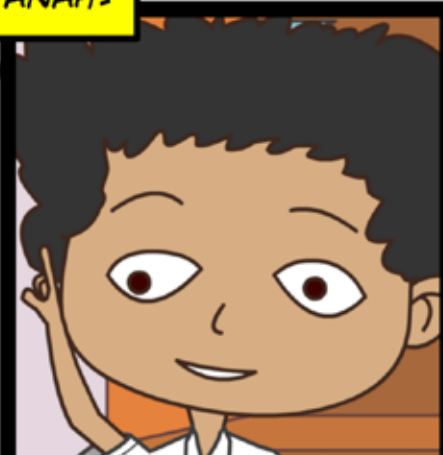

ATAN MULA DAPAT MEMBERI FOKUS BILA BELAJAR.

AKHIRNYA, ATAN DAPAT  
MENCAPAI KECEMERLANGAN  
DALAM PELAJARANNYA.

UNTUK HIDUP SIHAT  
TANPA JANGKITAN  
CACING..

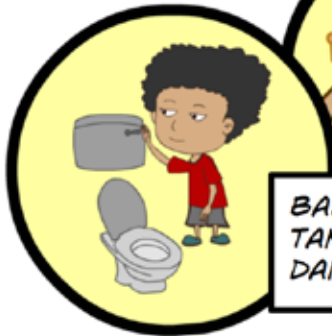

BASUH TANGAN SETELAH KE  
TANDAS, BERMAIN DENGAN TANAH  
DAN SEBELUM MAKAN!

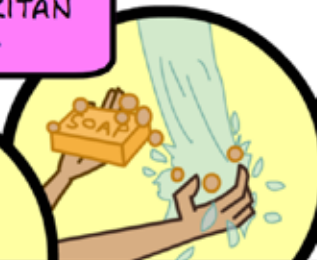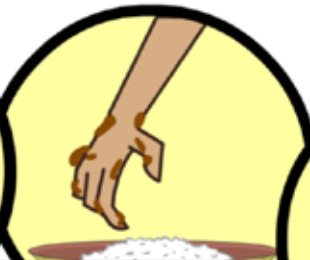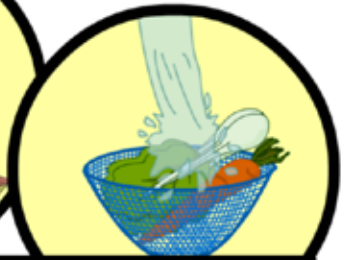

BASUH SAYURAN DAN  
BUAHAN DENGAN AIR  
BERSIH!

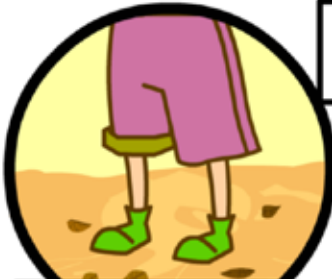

PAKAI KASUT  
BILA KELUAR

TUTUP MAKANAN  
DARIPADA LALAT

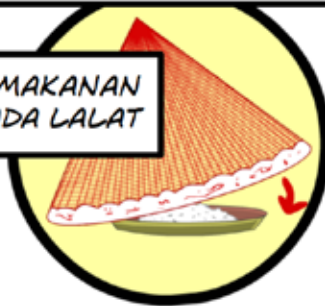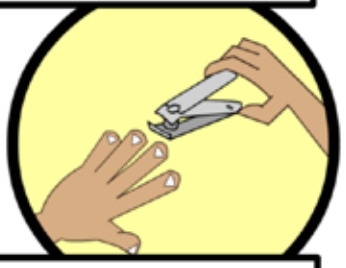

POTONG KUKU PENDEK

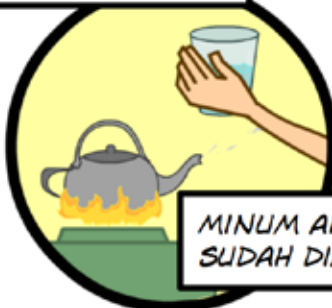

MINUM AIR YANG  
SUDAH DIMASAK

INGAT YA!

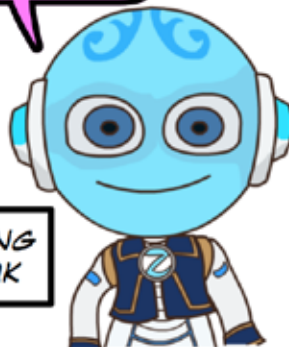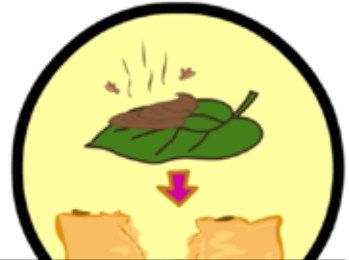

BUANG AIR JAUH DARI  
TEMPAT BERMAIN



Tandakan (✓) pada amalan yang betul dan (X) pada amalan yang salah.

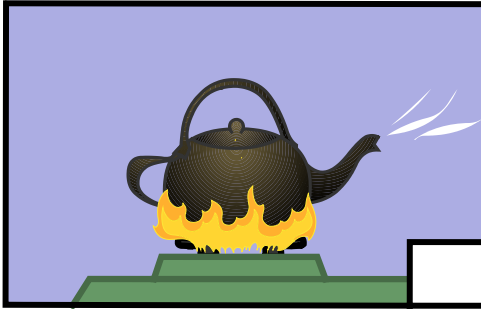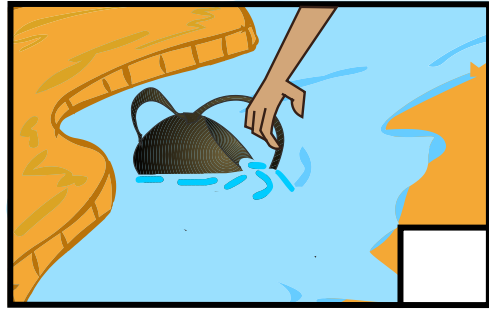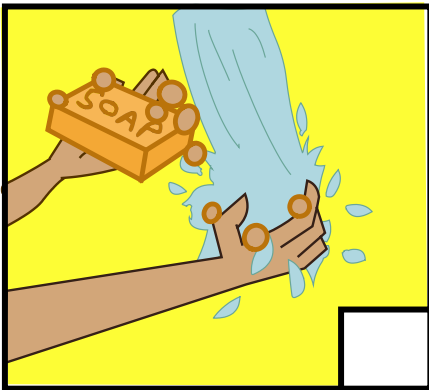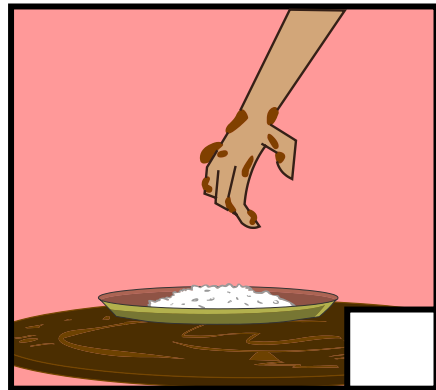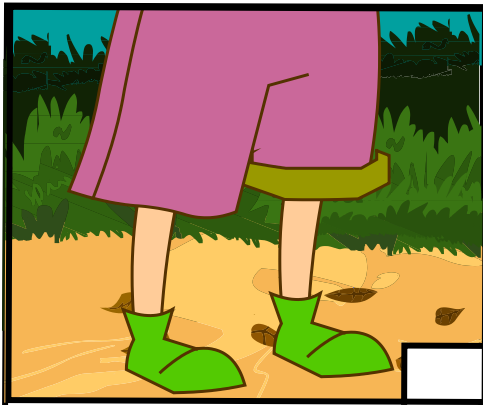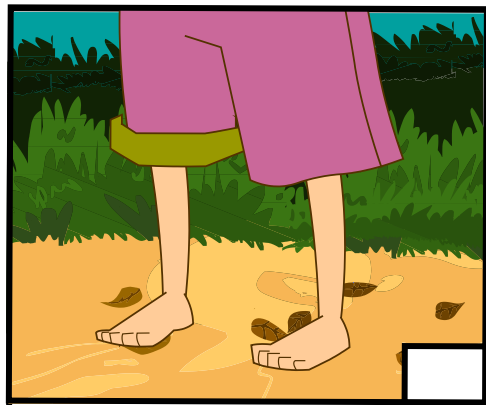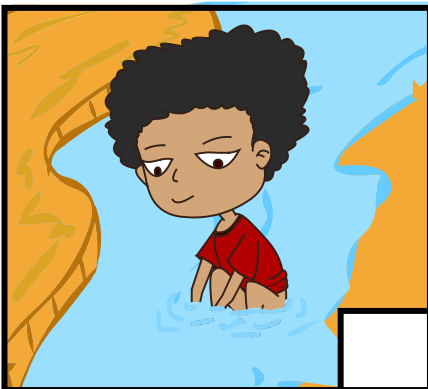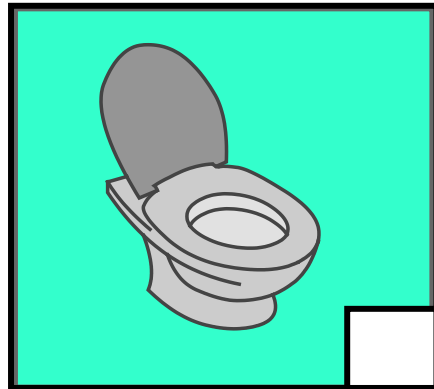

Warnakan Poster di bawah mengikut warna kesukaan adik-adik.

UNTUK MENGELAKKAN JANGKITAN  
CACING TULARAN TANAH  
PAKAILAH KASUT  
BILA BERMAIN DI  
LUAR.

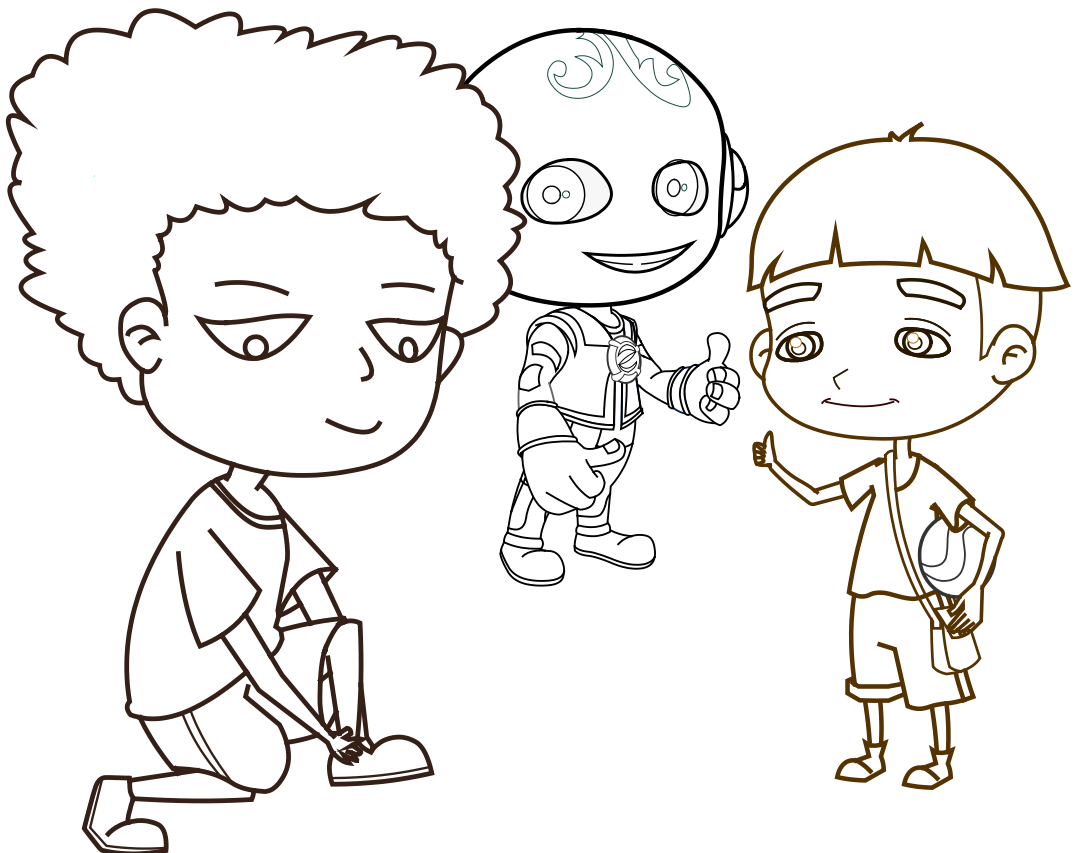

# Jagalah Kebersihan Diri

Marilah kita semua  
jaga kebersihan diri kita  
badan sihat orang pun suka  
baru hidup kita ceria~  
bangun pagi gosok gigi  
mandi dgn air yang bersih  
guna sabun cucikan badan  
guna tuala bersih badan dikeringkan  
shampu rambut ketika mandi  
selepas itu sikat rambut dengan rapi  
pakai pakaian yang bersih  
pasti orang rasa kasih  
potong kuku sebelum panjang  
untuk hindari bakteria  
cuci tangan sebelum makan  
supaya tidak dijangkiti kuman  
makanlah buah dan sayuran  
dan cucikan sebelum makan  
supaya kita sihat dan kuat  
dan tidak dijangkiti penyakit  
pakai kasut yang bersih  
bila hendak keluar rumah  
untuk melindungi kaki kita  
dari cacing dan kotoran

(solo)

Amalkan cara hidup sihat  
menjaga tubuh dan penampilan  
baru hidup penuh berkat  
dan penuh senyuman  
dan penuh senyuman

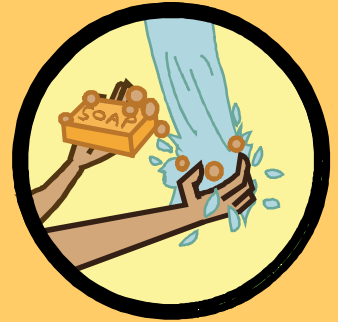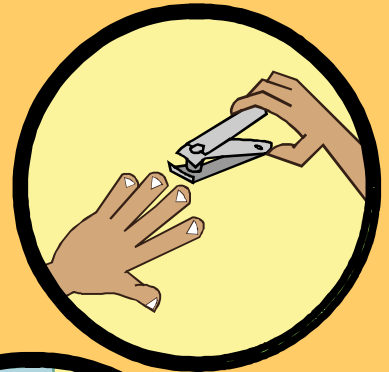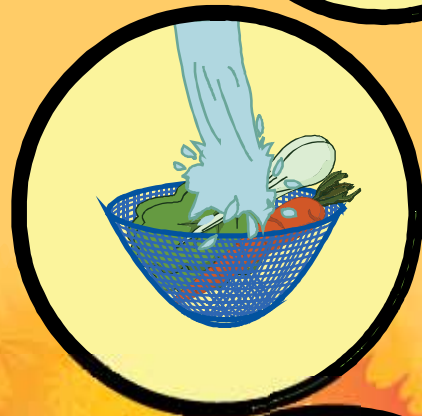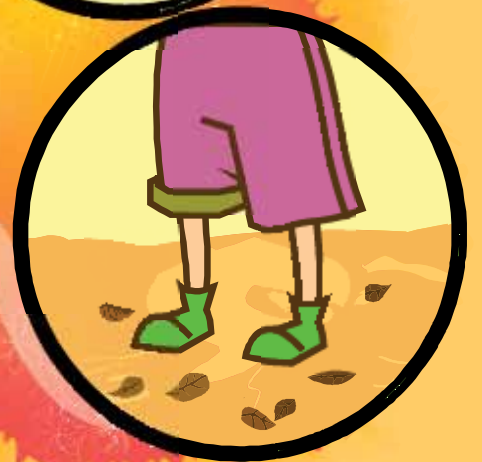

lagu dan lirik : Abu Zaharen

# Health Education Learning Package to control Soil-Transmitted Helminthiasis among Orang Asli Schoolchildren

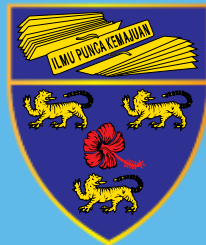

**UNIVERSITI  
MALAYA**

*The Leader in Research & Innovation*

Project team: Assoc. Prof. Dr. Hesham M. Al-Mekhlafi  
Professor Dr. Rohela Mahmud  
Assoc. Prof. Dr. Yvonne Al Lim  
Dr. Ahmed K. Al-Delaimy

Department of Parasitology, Faculty of Medicine,  
University of Malaya

Contact: [halmekhlafi@yahoo.com](mailto:halmekhlafi@yahoo.com),  
[halmekhlafi@um.edu.my](mailto:halmekhlafi@um.edu.my)

In collaboration with:

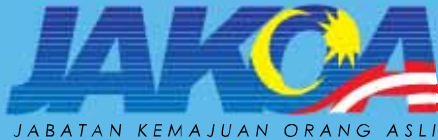

JABATAN KEMAJUAN ORANG ASLI

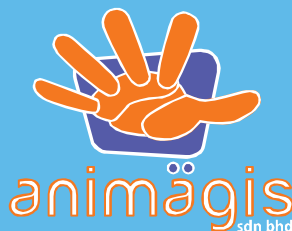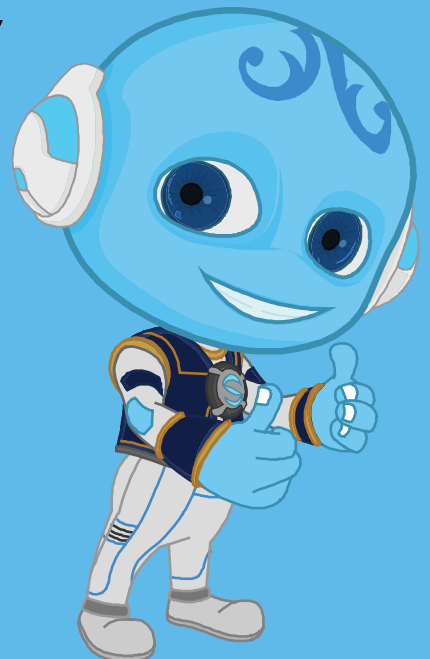

Supplement: 13071_2014_1598_MOESM2_ESM.pdf [file 13071_2014_1598_MOESM2_ESM.pdf]
